# Supplementary material for: Optimized full CO2 photoreduction process by defective spinel atomic layers
Source: Royal Society of Chemistry journal article supplement (doi:10.1039/d3cc03520d), 2023-01-01
Supplement: d3cc03520d1.pdf [file d3cc03520d1.pdf]

## **Optimized Full CO<sub>2</sub> Photoreduction Process by Defective Spinel Atomic Layers**

Yang Wu<sup>2,+</sup>, Dongpo He<sup>1,+</sup>, Lei Li<sup>2,+</sup>, Zhiqiang Wang<sup>2</sup>, Wensheng Yan<sup>2</sup>, Junfa Zhu<sup>2</sup>, Yang Pan<sup>2</sup>, Qingxia Chen<sup>1,\*</sup>, Xingchen Jiao<sup>1,\*</sup>, Yi Xie<sup>2</sup>

<sup>1</sup>Key Laboratory of Synthetic and Biological Colloids, Ministry of Education, School of Chemical and Material Engineering, Jiangnan University, Wuxi 214122, China.

<sup>+</sup>These authors contributed equally to this work.

<sup>2</sup>Hefei National Research Center for Physical Sciences at Microscale, National Synchrotron Radiation Laboratory, University of Science and Technology of China, Hefei 230026, China.

\*Corresponding author.

Email: qxchen@jiangnan.edu.cn; xcjiao@jiangnan.edu.cn

### **EXPERIMENTAL SECTION**

#### **Synthesis of the ZnGa<sub>2</sub>O<sub>4</sub> atomic layers:**

220 mg Zn(CH<sub>3</sub>COO)<sub>2</sub>·2H<sub>2</sub>O dissolved in 20 mL of deionized water, then 512 mg Ga(NO<sub>3</sub>)<sub>3</sub> was added by stirring for 20 min, followed by 10 mL of anhydrous ethylenediamine. After 10 min of magnetic stirring, the liquid was transferred to a 50 mL Teflon lined hydrothermal autoclave, heated at 180 °C for 24 h, and then removed and cooled naturally at room temperature. The obtained white precipitate was washed with water and ethanol for several times, and then dried vacuum overnight to obtain ZnGa<sub>2</sub>O<sub>4</sub> atomic layers.

#### **Synthesis of the defective ZnGa<sub>2</sub>O<sub>4</sub> atomic layers:**

The obtained white ZnGa<sub>2</sub>O<sub>4</sub> nanosheets were heated at 600 °C in a 5% H<sub>2</sub>/Ar atmosphere for 1 h, and then removed and cooled naturally at room temperature. The collected solid powder was used for progressive characterization and denoted as defective ZnGa<sub>2</sub>O<sub>4</sub> atomic layers.

### **Characterization:**

TEM images were performed with a JEOL-2010 TEM with an acceleration voltage of 200 kV. HRTEM images were carried out on a JEOL JEM-ARM200F TEM/STEM with a spherical aberration corrector. XRD patterns were obtained from a Philips X'Pert Pro Super diffractometer with Cu K $\alpha$  radiation ( $\lambda = 1.54178 \text{ \AA}$ ). UV–vis diffuse reflectance spectra were measured on a Perkin Elmer Lambda 950 UV–vis–NIR spectrophotometer. XPS spectra were acquired on an ESCALAB MKII system with Al K $\alpha$  ( $h\nu = 1486.6 \text{ eV}$ ) as the excitation source. The binding energies obtained in the XPS spectral analysis were corrected for specimen charging by referencing C 1s to 284.8 eV. *In situ* FTIR spectra were obtained by using a Thermo Scientific Nicolet iS50. Synchrotron-radiation photoemission spectroscopy (SRPES), X-ray absorption near-edge spectroscopy (XANES) spectra, and SVUV-PIMS spectra were executed at the National Synchrotron Radiation Laboratory (NSRL) in Hefei, China. BET surface area was acquired on automatic microporous gas adsorption analyzer system (ASAP 2020 M PLUS).

### **Photocatalytic CO<sub>2</sub> reduction measurements:**

The photocatalytic CO<sub>2</sub> reduction measurements were conducted in a sealed off-line reactor (Perfect light Limited, Beijing). In the CO<sub>2</sub> photocatalytic conversion process, 5 mg ZnGa<sub>2</sub>O<sub>4</sub> powders were initially dispersed in 1 mL deionized water and then spined dropped onto a quartz glass. After heating at 60 °C for 30 minutes, the ZnGa<sub>2</sub>O<sub>4</sub> powders were successfully deposited on the quartz glass (diameter: 3.6 cm and area: 10.2 cm<sup>2</sup>). After putting the quartz glass in the reaction cell as well as injecting 10 mL deionized water on the bottom, the reaction cell was vacuum-treated for three times, which was then pumped by high-purity CO<sub>2</sub> (99.99%) to reach an atmospheric pressure. The light irradiation comes from a CEL-HXF300 Xe lamp (Beijing China Education Au-light Co., Ltd.) with a standard AM 1.5G filter and cut 400 nm filter, outputting the light density of about 100 mW/cm<sup>2</sup>, calibrated by an CEL-NP2000 Optical Power Meter (Beijing China Education Au-light Co., Ltd.). The instrument was initially pumped and purged for three times, which was then filled by 99.99% high-purity CO<sub>2</sub> to reach an atmospheric pressure. During the

light irradiation, the evolved gas products were qualitatively examined by Agilent GC-7890B gas chromatograph equipped with flame ionization detector (FID) and thermal conductivity detector (TCD) while ultrahigh-purity argon was used as a carrier gas.

#### **Apparent quantum yield (AQY) experiments:**

The apparent quantum yield (AQY) was calculated as the ratio between the number of photogenerated electrons consumption and the number of incident photons, by taking into account the fact that two electrons are required to produce one CH<sub>3</sub>COOH molecule. The wavelength-dependent AQY was measured under the same photocatalytic reaction condition, except for the monochromatic light wavelengths (450, 550, and 650 nm).

#### ***In situ* FTIR spectra experiments:**

*In situ* FTIR spectra were obtained by using a Thermo Scientific Nicolet iS50, equipped with an MCT detector cooled by liquid nitrogen and a commercial reaction chamber from Harrick Scientific. After degassed at 100 °C in N<sub>2</sub> atmosphere for 20 min, the gas flow was switched to high-purity CO<sub>2</sub> (99.99%) for adsorption. The background spectrum was collected after 30 minutes of adsorption in high-purity CO<sub>2</sub>. Each spectrum was recorded by averaging 64 scans at a 4 cm<sup>-1</sup> spectral resolution.

#### **DFT calculation details:**

The first-principles calculations were performed with the Vienna ab initio simulation package.<sup>[1]</sup> The interaction between ions and valence electrons was described using projector augmented wave (PAW) potentials, and the exchange-correlation between electrons was treated through using the generalized gradient approximation (GGA) in the Perdew-Burke-Ernzerhof (PBE) form.<sup>[2]</sup> To achieve the accurate density of the electronic states, the plane wave cutoff energy was 480 eV. The ionic relaxations for all structures in the calculations were carried out under the conventional energy (10<sup>-3</sup> eV) and force (0.01 eV/Å) convergence criteria. The ZnGa<sub>2</sub>O<sub>4</sub> slab along the [001] projection was used to mimic the as-prepared nanosheets, where a 1.5 nm vacuum layer was added to avoid interactions.

Gibbs free energies for each gaseous and adsorbed species were calculated at 298.15 K, according to the expression:

$$G = E_{\text{DFT}} + E_{\text{ZPE}} - TS$$

$$E_{\text{ZPE}} = \sum_i 1/2 h\nu_i$$

$$\Theta_i = h\nu_i / k$$

$$S = \sum_i R[\ln(1 - e^{-\Theta_i/T})^{-1} + \Theta_i/T (e^{\Theta_i/T} - 1)^{-1}]$$

where  $E_{\text{DFT}}$  is the electronic energy calculated for specified geometrical structures,  $E_{\text{ZPE}}$  is the zero-point energy,  $S$  is the entropy,  $h$  is the Planck constant,  $\nu$  is the computed vibrational frequencies,  $\Theta$  is the characteristic temperature of vibration,  $k$  is the Boltzmann constant, and  $R$  is the molar gas constant. For adsorbates, all  $3N$  degrees of freedom were treated as frustrated harmonic vibrations with negligible contributions from the catalysts' surfaces. In the computational hydrogen electrode (CHE) model,<sup>[3]</sup> each reaction step was treated as a simultaneous transfer of the proton-electron pair as a function of the applied potential. Thus, free energy changes can be represented by

$$\Delta G[\text{COOH}^*] = G[\text{COOH}^*] + G[\text{H}^+ + \text{e}^-] - (G[*] + G[\text{CO}_2] + 2 \times G[\text{H}^+ + \text{e}^-])$$

$$\Delta G[\text{CO}^*] = G[\text{CO}^*] + G[\text{H}_2\text{O}] - (G[*] + G[\text{CO}_2] + 2 \times G[\text{H}^+ + \text{e}^-])$$

$$G[\text{H}^+ + \text{e}^-] = 1/2 G[\text{H}_2] - eU$$

where  $U$  is the applied overpotential and  $e$  is the elementary charge.

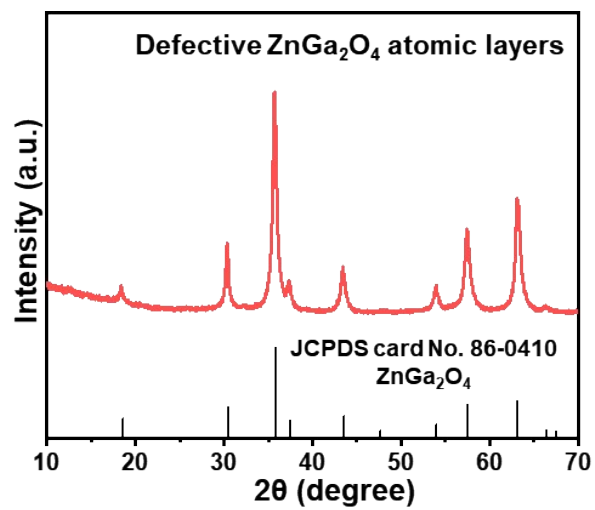

Figure S1. XRD pattern for the defective  $\text{ZnGa}_2\text{O}_4$  atomic layers.

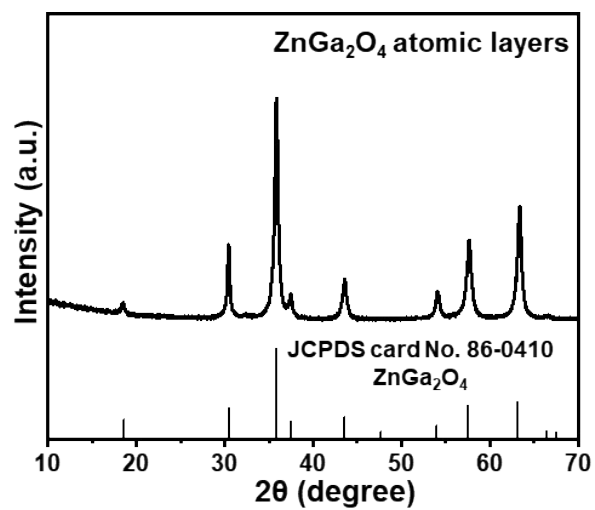

Figure S2. XRD pattern for the  $\text{ZnGa}_2\text{O}_4$  atomic layers.

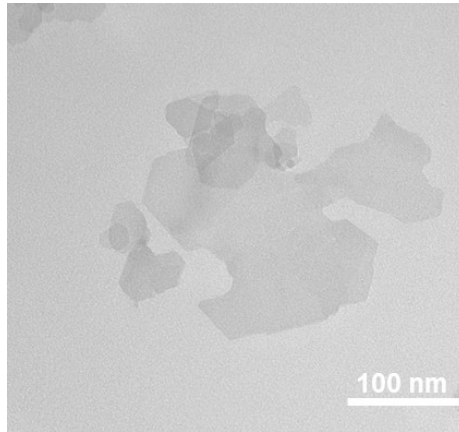

Figure S3. TEM image for the ZnGa<sub>2</sub>O<sub>4</sub> atomic layers.

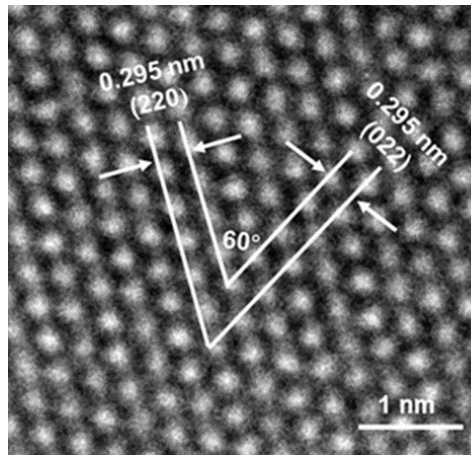

Figure S4. HRTEM image for the ZnGa<sub>2</sub>O<sub>4</sub> atomic layers.

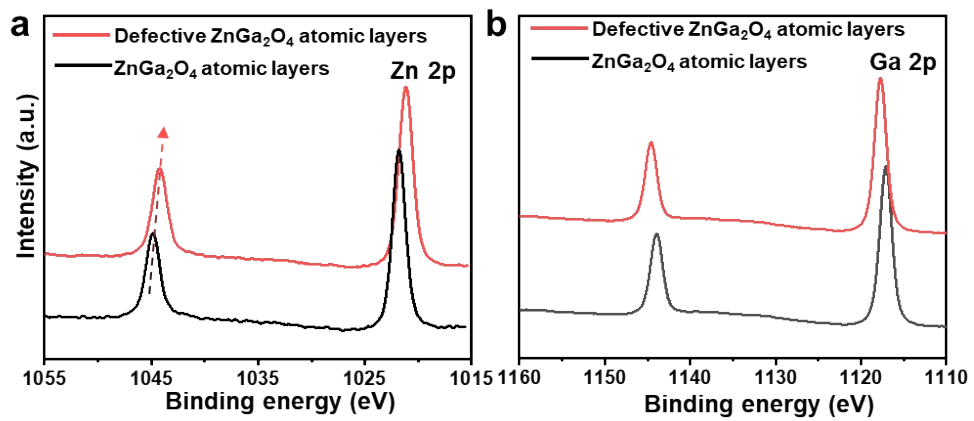

Figure S5. (a) Zn 2p and (b) Ga 2p XPS spectra for the defective ZnGa<sub>2</sub>O<sub>4</sub> atomic layers and the ZnGa<sub>2</sub>O<sub>4</sub> atomic layers.

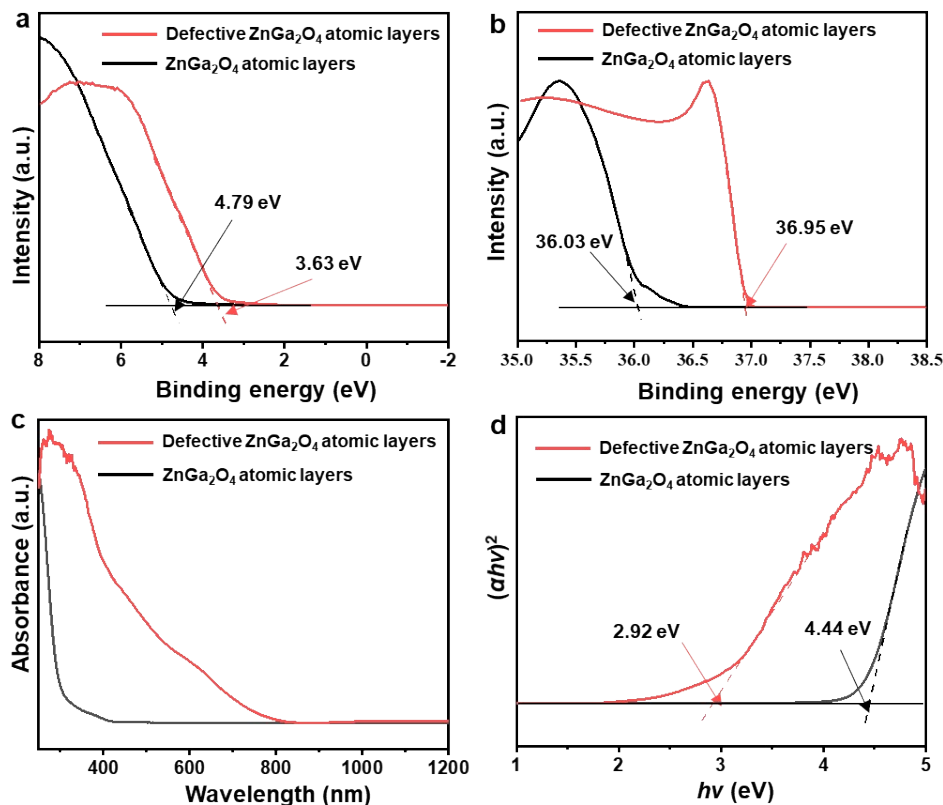

Figure S6. Experimental results concerning the electronic band structures. (a) Valence-band position, (b) the secondary electron cutoff energy measured by synchrotron-radiation SRPES spectra, (c) UV-vis diffuse reflectance spectra and (d) the band gaps based on UV-vis diffuse reflectance spectra for the defective ZnGa<sub>2</sub>O<sub>4</sub> atomic layers and the ZnGa<sub>2</sub>O<sub>4</sub> atomic layers.

Figure S6a indicated the work functions for the ZnGa<sub>2</sub>O<sub>4</sub> atomic layers and the defective ZnGa<sub>2</sub>O<sub>4</sub> atomic layers could be calculated to be 4.79 and 3.63 V, respectively. Meanwhile, Figure S6b showed their valence band (VB) maximum were 3.97 and 3.05 V vs. vacuum level, respectively. Hence, the defective ZnGa<sub>2</sub>O<sub>4</sub> atomic layers and the ZnGa<sub>2</sub>O<sub>4</sub> atomic layers possessed the VB maximum of 1.77 and 3.85 V vs. normal hydrogen electrode (NHE) at pH 7, respectively. The UV-vis diffuse reflectance spectra (UV-DRS) displayed that the defective ZnGa<sub>2</sub>O<sub>4</sub> atomic layers and the ZnGa<sub>2</sub>O<sub>4</sub> atomic layers had the optical bandgaps of 2.92 and 4.44 V, respectively (Figure S6c-d). Based on synchrotron-radiation photoemission spectroscopy (SRPES) and UV-DRS spectra, the conduction band (CB) minimum for the defective ZnGa<sub>2</sub>O<sub>4</sub>

atomic layers and the  $\text{ZnGa}_2\text{O}_4$  atomic layers located at ca. -1.15 and -0.59 V vs. NHE at pH 7.

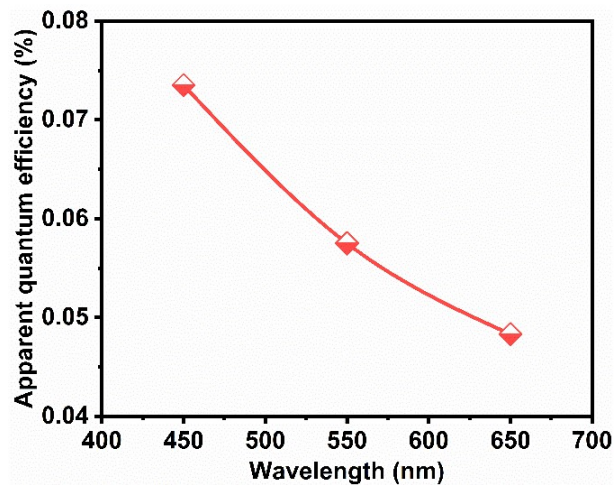

Figure S7. AQY values of  $\text{CO}_2$  photoreduction to CO over the defective  $\text{ZnGa}_2\text{O}_4$  atomic layers.

Figure S7 showed the measured AQY of CO evolution for the defective  $\text{ZnGa}_2\text{O}_4$  atomic layers, in which the AQY under the wavelength of 450 nm was about 0.074%.

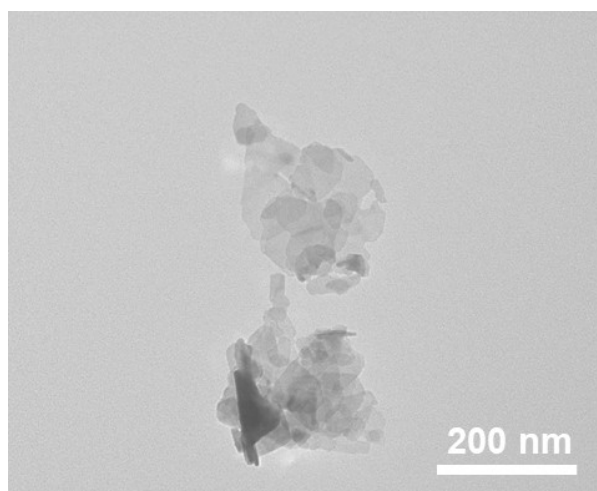

Figure S8. TEM image for the defective  $\text{ZnGa}_2\text{O}_4$  atomic layers after photocatalysis.



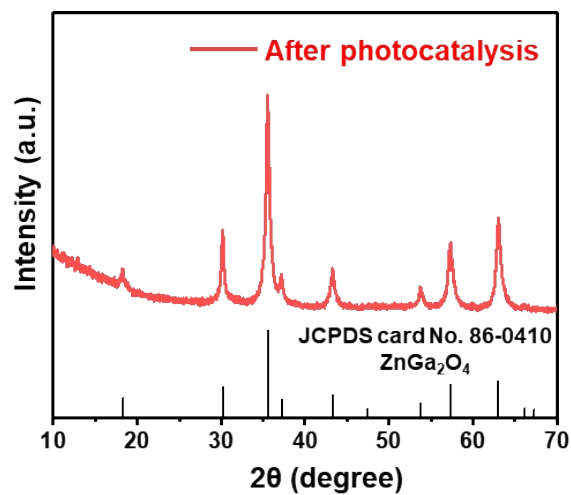

Figure S9. XRD patterns for the defective ZnGa<sub>2</sub>O<sub>4</sub> atomic layers after photocatalysis.

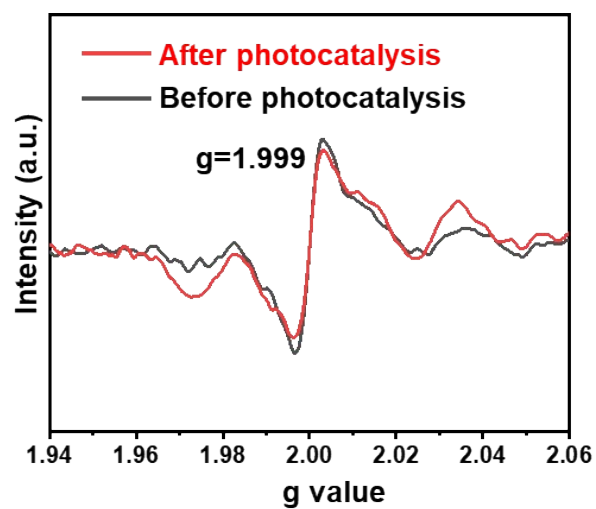

Figure S10. EPR spectra for the defective ZnGa<sub>2</sub>O<sub>4</sub> atomic layers before and after photocatalysis, in which the pattern of “Before catalysis” was indexed to that of the defective ZnGa<sub>2</sub>O<sub>4</sub> atomic layers in Figure 1d.

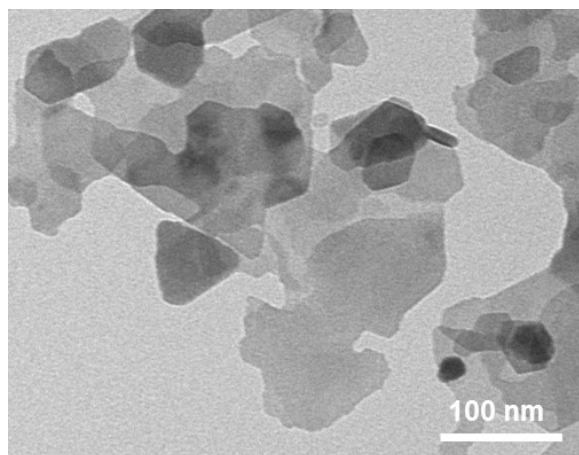

Figure S11. TEM image for the ZnGa<sub>2</sub>O<sub>4</sub> atomic layers after photocatalysis.

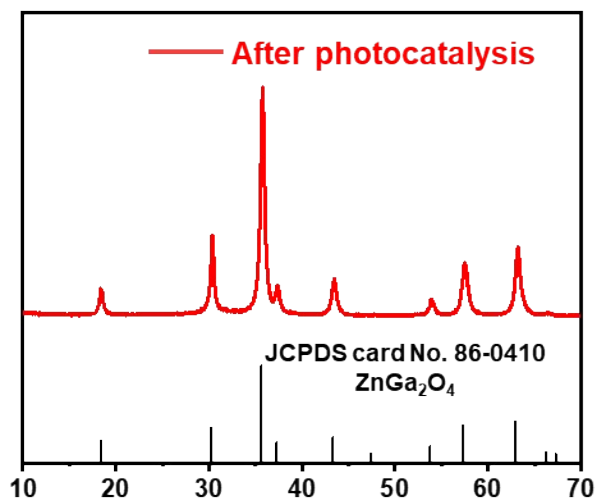

Figure S12. XRD patterns for the ZnGa<sub>2</sub>O<sub>4</sub> atomic layers after photocatalysis.

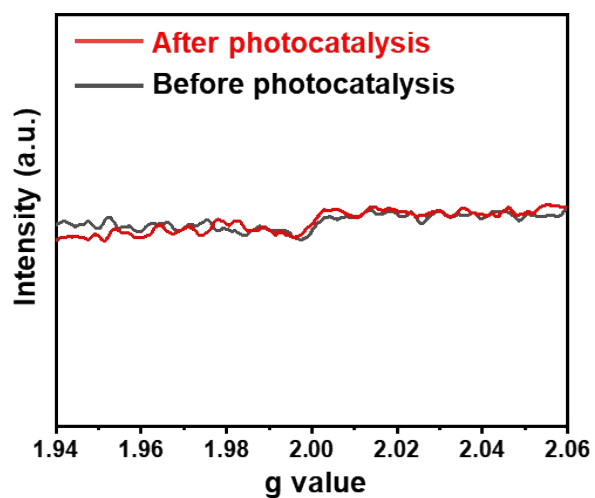

Figure S13. EPR spectra for the ZnGa<sub>2</sub>O<sub>4</sub> atomic layers before and after photocatalysis,

in which the pattern of “Before catalysis” was indexed to that of the  $\text{ZnGa}_2\text{O}_4$  atomic layers in Figure 1d.

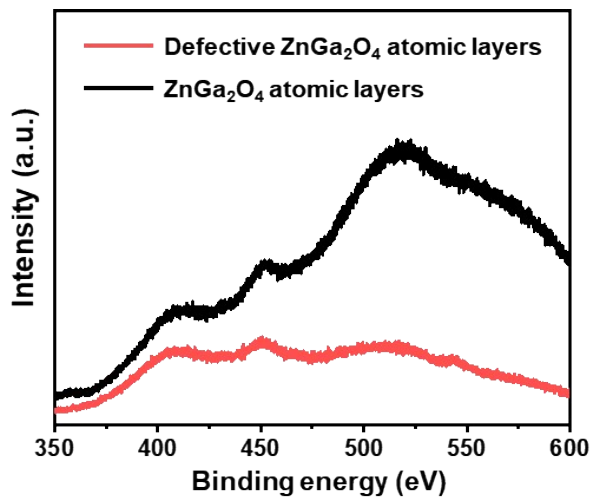

Figure S14. PL spectra for the defective  $\text{ZnGa}_2\text{O}_4$  atomic layers and the  $\text{ZnGa}_2\text{O}_4$  atomic layers.

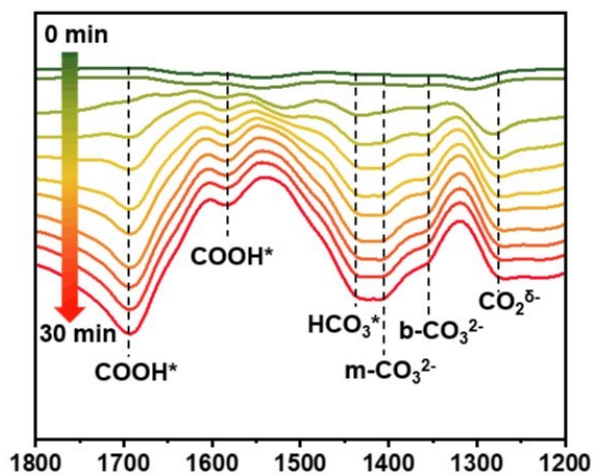

Figure S15. *In situ* FTIR spectra for the  $\text{ZnGa}_2\text{O}_4$  atomic layers during  $\text{CO}_2$  photoreduction.

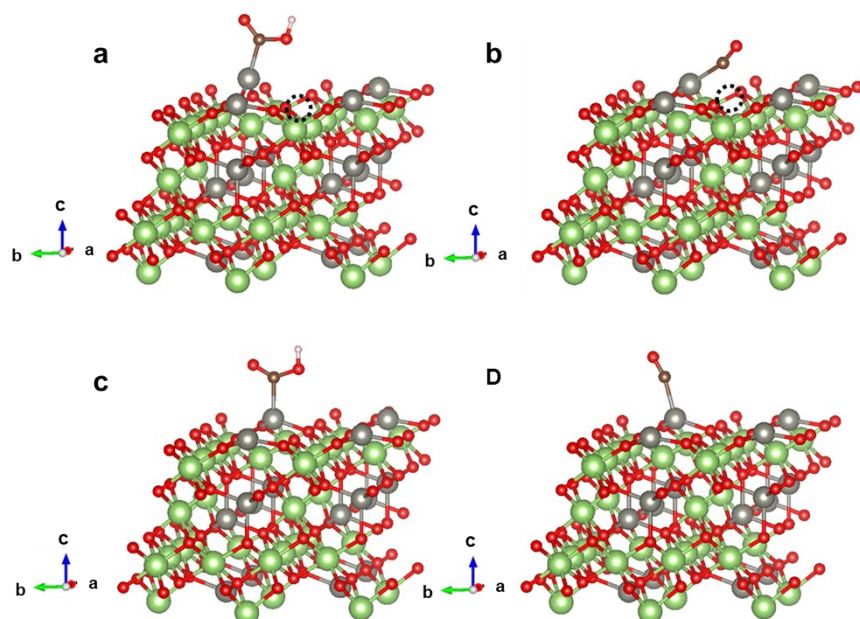

Figure S16. Schematic diagrams for the configurations of the key COOH\* intermediate of (a) the defective ZnGa<sub>2</sub>O<sub>4</sub> atomic layers and (c) the ZnGa<sub>2</sub>O<sub>4</sub> atomic layers. Schematic diagrams for the configurations of the key CO\* intermediate of (b) the defective ZnGa<sub>2</sub>O<sub>4</sub> atomic layers and (d) the ZnGa<sub>2</sub>O<sub>4</sub> atomic layers. The gray, green, and red globules represent Zn, Ga, and O atoms, respectively, and the black dotted circle corresponds to the location of the oxygen vacancy.

**Table S1:** Free energy (eV) correction for the species during CO<sub>2</sub> photoreduction over the defective ZnGa<sub>2</sub>O<sub>4</sub> atomic layers and the ZnGa<sub>2</sub>O<sub>4</sub> atomic layers slabs.

| Species           | E <sub>DFT</sub> | ZPE  | TΔS  |
|-------------------|------------------|------|------|
| H <sub>2</sub> O  | -14.21           | 0.56 | 0.67 |
| CO <sub>2</sub>   | -22.98           | 0.31 | 0.66 |
| H <sub>2</sub>    | -6.76            | 0.27 | 0.40 |
| CO                | -14.79           | 0.13 | 0.6  |
| CO <sub>2</sub> * |                  | 0.35 | 0.13 |
| COOH*             | /                | 0.66 | 0.16 |
| CO*               | /                | 0.24 | 0.11 |

**Table S2:** The DFT-calculated energy without correction (eV) of the defective ZnGa<sub>2</sub>O<sub>4</sub> atomic layer slab and the ZnGa<sub>2</sub>O<sub>4</sub> atomic layer slab as well as the corresponding intermediates during CO<sub>2</sub> photoreduction.

| Samples                                                      | $E_{\text{DEF}} (*)$ | $E_{\text{DFT}} (\text{CO}_2^*)$ | $E_{\text{DFT}} (\text{COOH}^*)$ | $E_{\text{DFT}} (\text{CO}^*)$ |
|--------------------------------------------------------------|----------------------|----------------------------------|----------------------------------|--------------------------------|
| defective ZnGa <sub>2</sub> O <sub>4</sub> atomic layer slab | -606.69              | -629.93                          | -632.04                          | -622.25                        |
| ZnGa <sub>2</sub> O <sub>4</sub> atomic layer slab           | -611.53              | -634.76                          | -636.50                          | -626.79                        |

**Table S3:** Free energy (eV) of CO<sub>2</sub> photoreduction for the defective ZnGa<sub>2</sub>O<sub>4</sub> atomic layer slab and the ZnGa<sub>2</sub>O<sub>4</sub> atomic layer slab.

| Samples                                                      | $\Delta G (*+\text{CO}_2)$ | $\Delta G (\text{CO}_2^*)$ | $\Delta G (\text{COOH}^*)$ | $\Delta G (\text{CO}^*)$ | $\Delta G (*+\text{CO})$ |
|--------------------------------------------------------------|----------------------------|----------------------------|----------------------------|--------------------------|--------------------------|
| defective ZnGa <sub>2</sub> O <sub>4</sub> atomic layer slab | 0                          | 0.30                       | 1.93                       | 0.59                     | 0.69                     |
| ZnGa <sub>2</sub> O <sub>4</sub> atomic layer slab           | 0                          | 0.31                       | 2.30                       | 0.88                     | 0.69                     |

## References

- [1] G. F. Kresse, *J. Comput. Mater. Sci* **1996**, 6, 15–50.
- [2] Y. K. Y. Zhang, W. T., *Phys. Rev. Lett.* **1998**, 80, 890–890.
- [3] B. H. Hammer, L. B.; Nørskov., *J. K. Phys. Rev. B* **1999**, 59, 7413–7421.
